# Supplementary material
Source: PubMed Central journal article supplement (PMC1661830)
Supplement: NIHMS13085-supplement-supp.pdf [file NIHMS13085-supplement-supp.pdf]

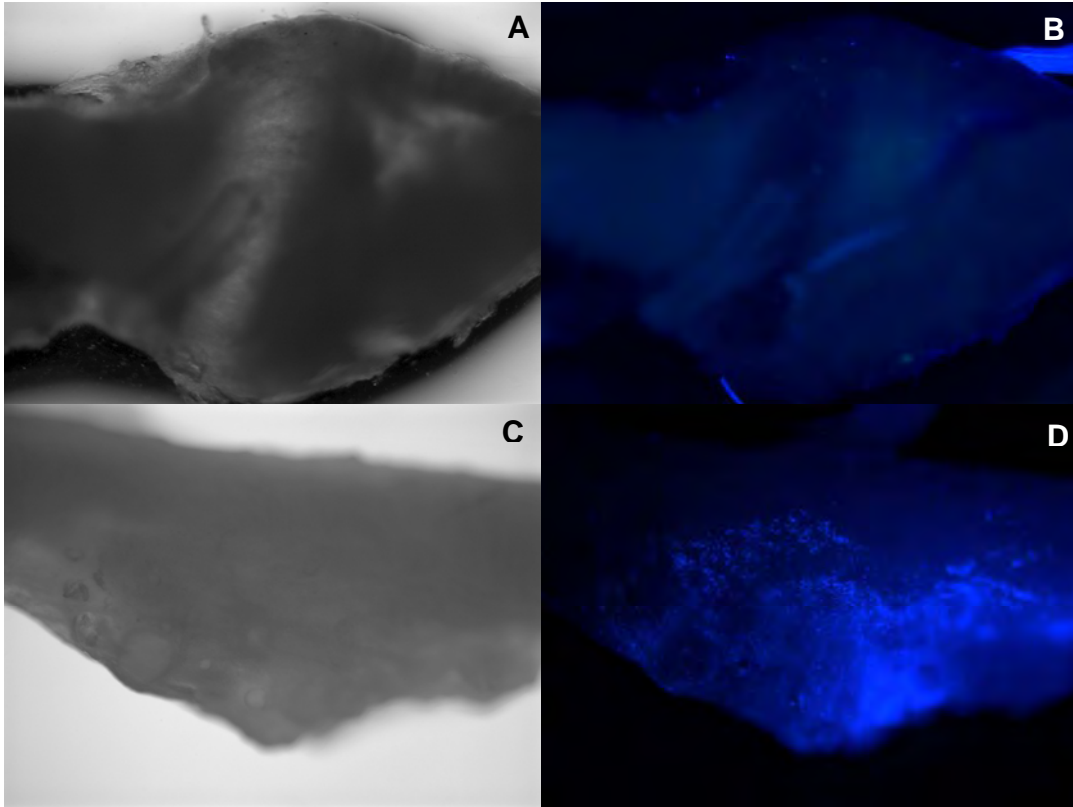

Top (A, B): Contralateral L5 DRG  
Bottom (C, D): Ipsilateral L5 DRG

Scale: 4x

Note that the ipsilateral L5 DRG is covered by the fluospheres (bright spots).
